# Supplementary material
Source: publisher site journal article supplement (https://www.dovepress.com/article/268110)
Supplement: Supplementary file 1 [file get_supplementary_file.php]

**Annex**

**Supporting table: Factors associated with COPD (unadjusted analysis)**

|  | **COPD by LLN Criteria** | | **COPD by GOLD criteria** | |
| --- | --- | --- | --- | --- |
|  | **OR (95% CI)** | **p-value** | **OR (95% CI)** | **p- value** |
| **Sex** (Female) | 1 |  | 1 |  |
| Male | 2.3 (1.4 – 3.7) | 0.001 | 1.8 (1.2 – 2.6) | 0.003 |
| **Age group** (40 – 49 years) | 1 |  | 1 |  |
| 50 – 59 years | 3.9 (1.4 – 10.4) | 0.007 | 3.4 (1.5 – 7.6) | 0.002 |
| ≥ 60 years | 12.2 (4.8 – 30.9) | <0.001 | 13.7 (6.6 – 28.6) | <0.001 |
| **Education category** (Illiterate) | 1 |  | 1 |  |
| Non - formal education | 0.4 (0.2 – 0.7) | 0.004 | 0.5 (0.3 – 0.8) | 0.01 |
| Primary school | 0.3 (0.2 – 0.6) | <0.001 | 0.3 (0.2 – 0.5) | <0.001 |
| Secondary school | 0.3 (0.2 – 0.6) | <0.001 | 0.2 (0.1 – 0.4) | <0.001 |
| High school and above | 0.2 (0.04 – 0.7) | 0.01 | 0.2 (0.1 – 0.6) | 0.02 |
| **Ethnicity** (Dalit) | 1 |  | 1 |  |
| Disadvantaged janajati | 0.6 (0.3 – 1.3) | 0.21 | 0.8 (0.4 – 1.5) | 0.5 |
| Relatively advantaged janajati | 0.1 (0.02 – 0.4) | 0.002 | 0.3 (1.3 – 0.7) | 0.004 |
| Upper caste | 0.8 (0.4 – 1.3) | 0.34 | 0.9 (0.6 – 1.5) | 0.75 |
| **Marital status** (Currently married) | 1 |  | 1 |  |
| Currently not married | 1.4 (0.8 – 2.5) | 0.22 | 1.9 (1.3 – 3.0) | 0.02 |
| **Occupational Status** (Employee) | 1 |  | 1 |  |
| Agriculture | 2.1 (0.9 – 5.0) | 0.12 | 1.8 (0.9 – 3.6) | 0.1 |
| Homemaker | 1.2 (0.4 – 3.5) | 0.72 | 1.4 (0.6 – 3.1) | 0.44 |
| Labor/wage worker | 1.1 (0.2 – 5.4) | 0.93 | 1.0 (0.3 – 3.6) | 0.96 |
| Retired/pensioner | 1.4 (0.4 – 5.9) | 0.62 | 1.8 (0.6 – 5.0) | 0.29 |
| Unemployed | 6.7 (2.7 – 16.4) | <0.001 | 7.1 (3.5 – 14.6) | <0.001 |
| **Body Mass Index (BMI) kg/m2** | 0.8 (0.7 - 0.8) | <0.001 | 0.8 (0.7 -0.9) | <0.001 |
| **Physical Activity** (Low<600 MET) | 1 |  | 1 |  |
| Medium (600-2999MET) | 0.4 (0.2 -0.8) | 0.04 | 0.4 (0.3 - 0.7) | <0.001 |
| High (≥3000MET) | 0.9 (0.4 -2.1) | 0.8 | 0.7 (0.3 - 1.6) | 0.41 |
| **Smoking Status** (Never Smoker) | 1 |  | 1 |  |
| Current Smoker | 8.0 (4.1 - 15.6) | <0.001 | 6.9 (4.2 – 11.4) | <0.001 |
| Former Smoker | 6.9 (3.6 – 13.3) | <0.001 | 5.0 (3.0 – 8.2) | <0.001 |
| **Secondhand Smoking** (No) | 1 |  | 1 |  |
| Yes | 1.8 (1.1– 2.9) | <0.001 | 2.1 (1.4 – 3.1) | <0.001 |
| **Kitchen chimney** (Yes) | 1 |  | 1 |  |
| No | 2.3 (1.2 – 4.4) | 0.008 | 1.7 (1.1 – 2.6) | 0.03 |
| **Black smoke mark in kitchen** (No) | 1 |  |  |  |
| Yes | 2.0 (1.2 – 3.4) | 0.006 | 1.6 (1.1 – 2.3) | 0.02 |
| **Use of Mosquito Repellent** (No) | 1 |  | 1 |  |
| Yes | 1.5 (0.8 – 2.5) | 0.1 | 1.3 (0.8 – 1.9) | 0.29 |
| **Exposure to biomass fuel** (No) | 1 |  | 1 |  |
| Yes | 3.1 (2.0 – 4.9) | <0.001 | 2.1 (1.5 – 3.1) | <0.001 |
| **Childhood lung infection** (No) | 1 |  | 1 |  |
| Yes | 5.0 (2.8 – 8.9) | <0.001 | 4.5 (2.7 – 7.5) | <0.001 |
| **Occupational exposure to dirt and dust** (Not exposed) | 1 |  | 1 |  |
| Exposed | 1.1 (0.6 – 2.1) | 0.68 | 1.2 (0.7 – 2.1) | 0.3 |
| **History of Tuberculosis** (No) | 1 |  | 1 |  |
| Yes | 2.2 (0.8 – 6.4) | 0.15 | 1.7 (0.7 – 4.5) | 0.27 |
